# Supplementary material for: BCAS1 defines a heterogeneous cell population in diffuse gliomas
Source: PubMed Central journal article supplement (PMC10812236; doi:10.18632/oncotarget.28553), 2024-01-24
Supplement: oncotarget-15-28553-s001.pdf [file oncotarget-15-28553-s001.pdf]

## BCAS1 defines a heterogeneous cell population in diffuse gliomas

### SUPPLEMENTARY MATERIALS

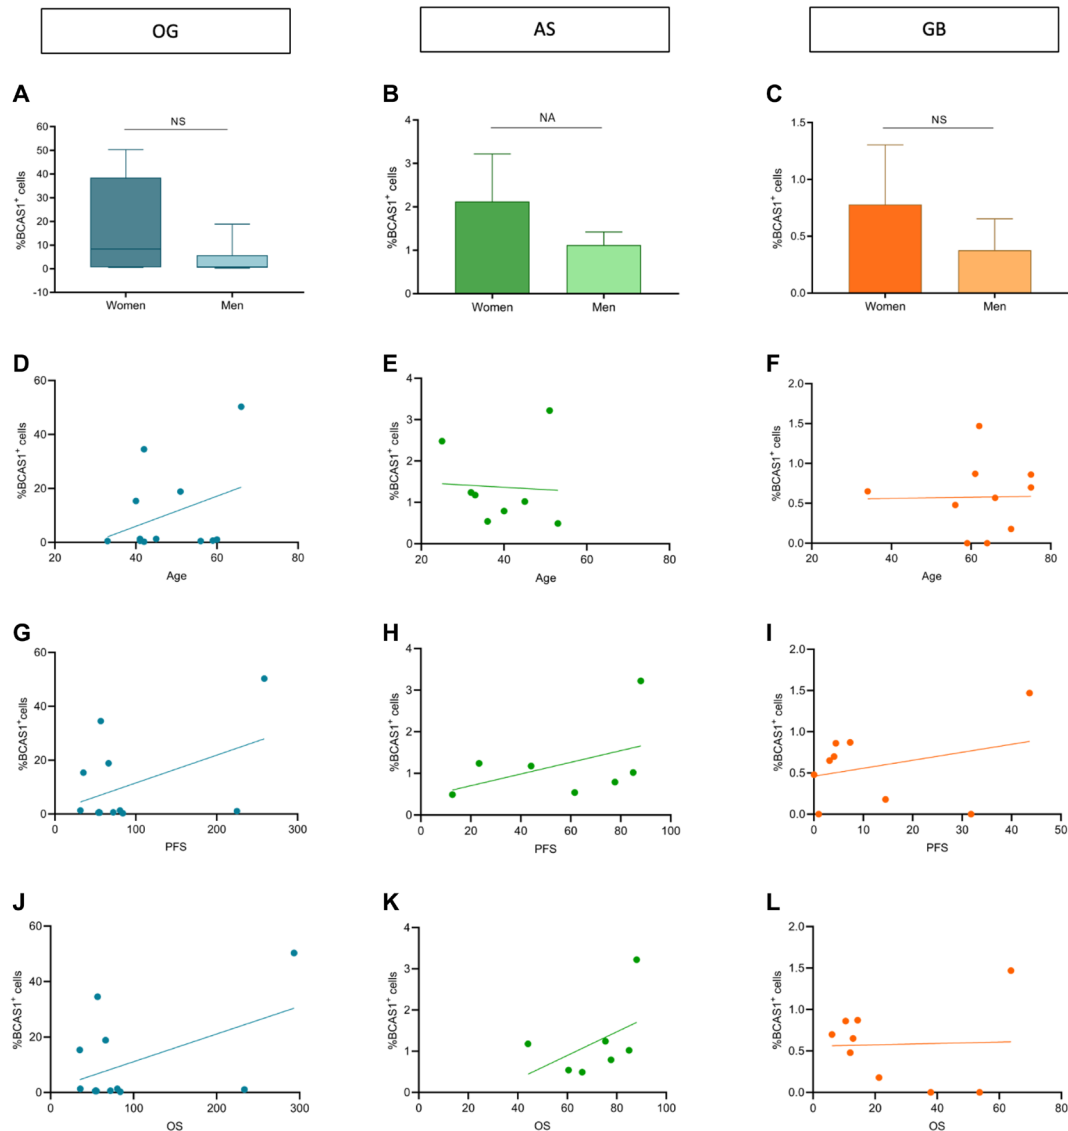

**Supplementary Figure 1: The percentage of BCAS1<sup>+</sup> cells does not correlate with the sex or the age of patient with diffuse glioma.** Comparisons between the percentage of BCAS1<sup>+</sup> cells and the sex (A–C), the age (D–F), the progression-free survival (PFS) (G–I) or the overall survival (OS) (J–L) of the patients. (A) Percentage of BCAS1<sup>+</sup> cells in women and men with OG.  $n = 6$  women,  $n = 6$  men; Mann-Whitney test;  $p$ -value = 0.2403. (B) Percentage of BCAS1<sup>+</sup> cells in women and men with AS.  $n = 2$  women,  $n = 6$  men. (C) Percentage of BCAS1<sup>+</sup> cells in women and men with GB.  $n = 5$  women,  $n = 5$  men; Unpaired  $t$  test;  $p$ -value = 0.1679. (D) Percentage of BCAS1<sup>+</sup> cells front the age of patients with OG. Trend line  $R^2 = 0.1166$ ;  $p$ -value = 0.2774. (E) Percentage of BCAS1<sup>+</sup> cells front the age of patients with AS. Trend line  $R^2 = 0.0032$ ;  $p$ -value = 0.8930. (F) Percentage of BCAS1<sup>+</sup> cells front the age of patients with GB. Trend line  $R^2 = 0.0004$ ;  $p$ -value = 0.9590. (G) Percentage of BCAS1<sup>+</sup> cells front the PFS of patients with OG. Trend line  $R^2 = 0.2093$ ;  $p$ -value = 0.1348. (H) Percentage of BCAS1<sup>+</sup> cells front the PFS of patients with AS. Trend line  $R^2 = 0.2059$ ;  $p$ -value = 0.3065. (I) Percentage of BCAS1<sup>+</sup> cells front the PFS of patients with GB. Trend line  $R^2 = 0.09723$ ;  $p$ -value = 0.4140. (J) Percentage of BCAS1<sup>+</sup> cells front the OS of patients with OG. Trend line  $R^2 = 0.2439$ ;  $p$ -value = 0.1027. (K) Percentage of BCAS1<sup>+</sup> cells front the OS of patients with AS. Trend line  $R^2 = 0.2211$ ;  $p$ -value = 0.2869. (L) Percentage of BCAS1<sup>+</sup> cells front the OS of patients with GB. Trend line  $R^2 = 0.001325$ ;  $p$ -value = 0.9259. Center lines in the boxes indicate the median and whiskers indicate the minimum and the maximum values. Abbreviation: NS: Not significant. NA: Statistical analysis was not performed because  $n = 2$ .

Control #2

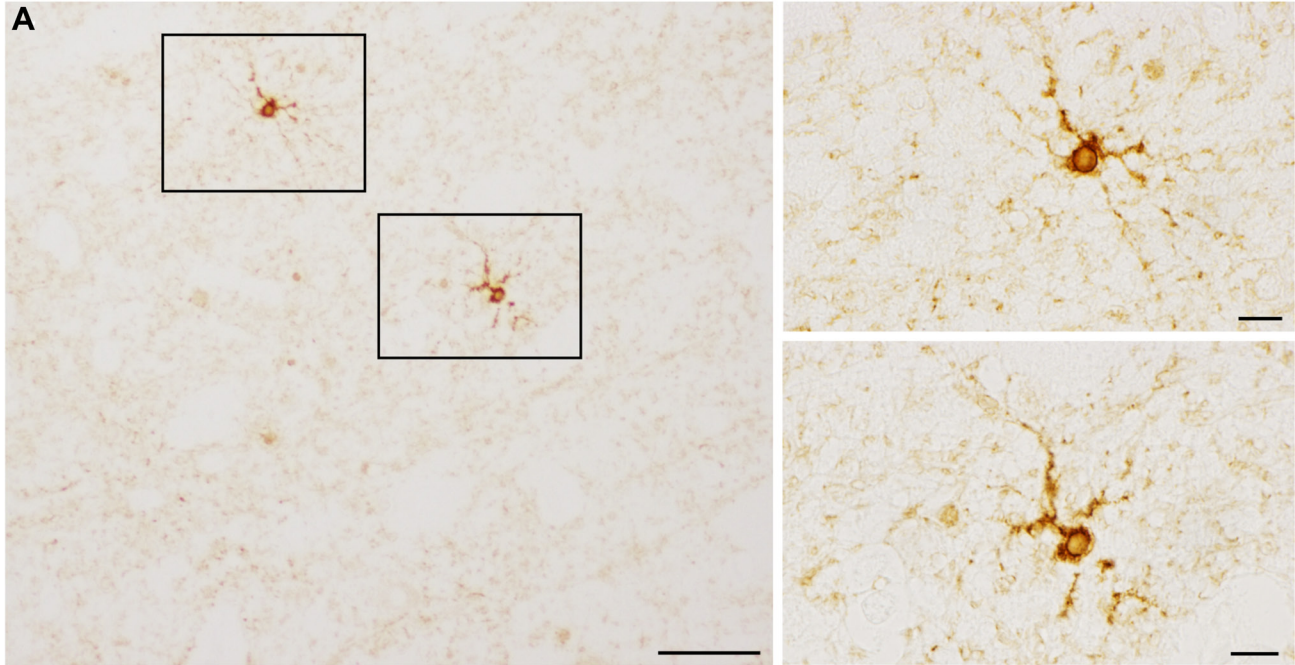

Control #3

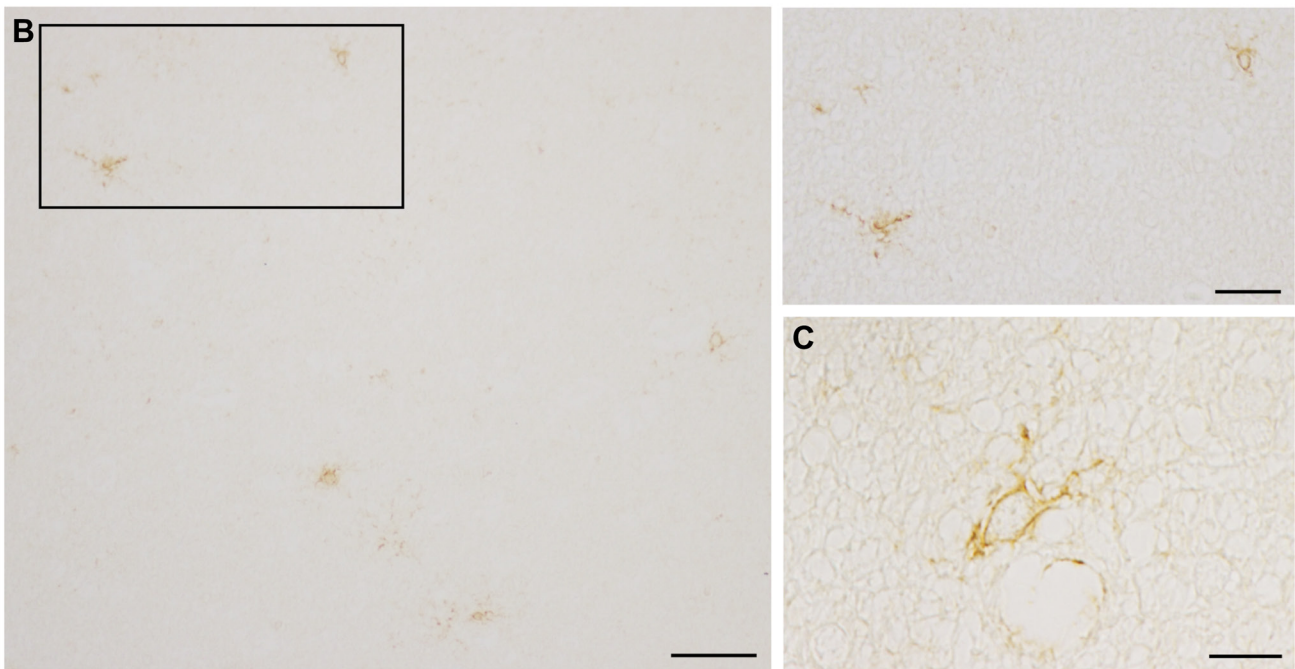

**Supplementary Figure 2: BCAS1<sup>+</sup> cells in non-tumoral human brain tissues.** Immunohistochemistry against BCAS1 in two additional control samples (non-tumoral human brain tissue). All BCAS1<sup>+</sup> cells found in control samples present stellate morphology with a small nucleus and numerous branched cytoplasmic expansions. (A) BCAS1<sup>+</sup> cells from a control brain human tissue (control #2). Inserts show high magnification of BCAS1<sup>+</sup> cells. (B) BCAS 1<sup>+</sup> cells from another control human brain tissue (control #3). The insert shows high magnification of BCAS1<sup>+</sup> cells. (C) Detail of a BCAS1<sup>+</sup> cell with stellate morphology in the control #3. Scale bars: A panoramic, 50  $\mu$ m; A insert, 10  $\mu$ m; B panoramic, 50  $\mu$ m; B insert, 25  $\mu$ m; C, 10  $\mu$ m.

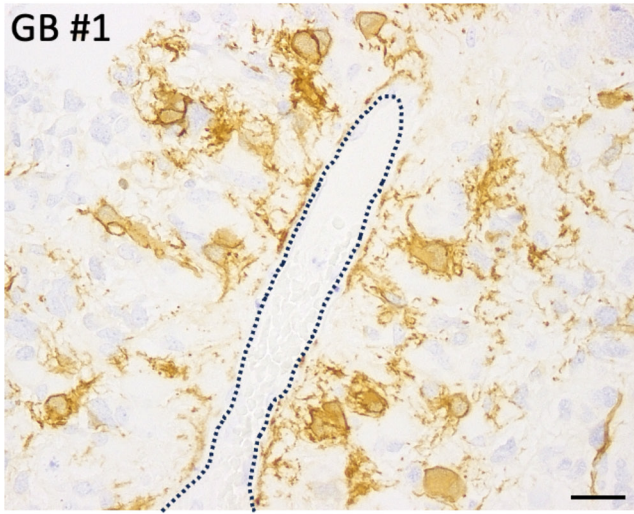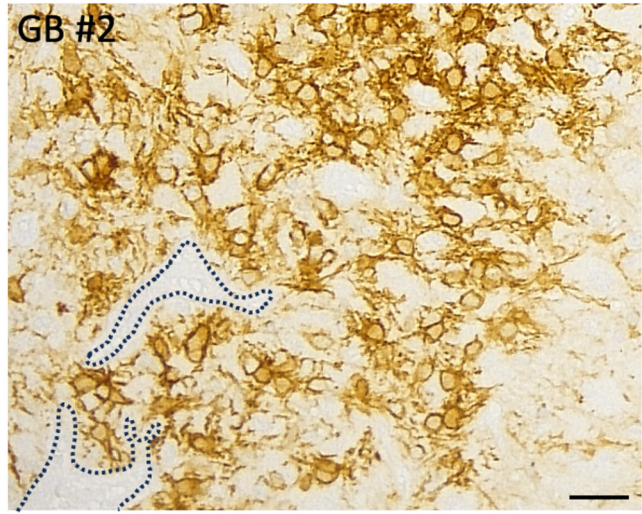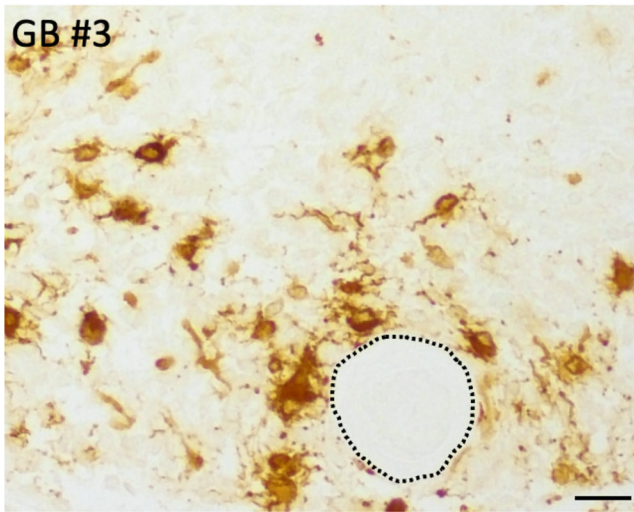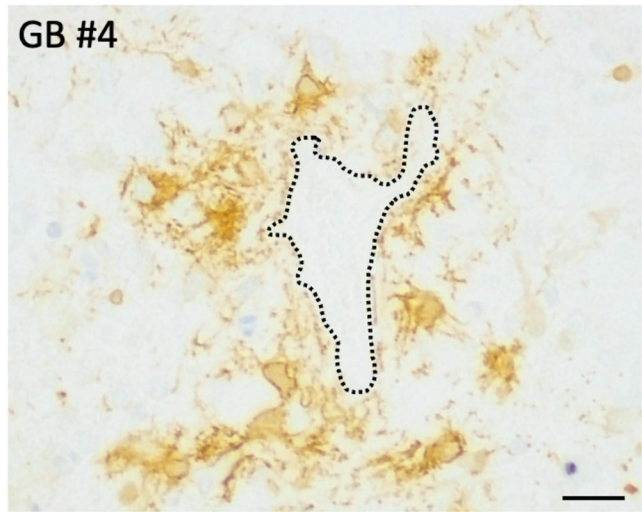

**Supplementary Figure 3: BCASI<sup>+</sup> cells are located in close proximity to the blood vessels in GB: DAB immunohistochemistry against BCASI in GB samples from 4 different patients.** Note that BCASI<sup>+</sup> cells (brown) are located in close vicinity to blood vessels. All blood vessels have been delineated by a dotted line. Scale bars: 25  $\mu$ m.

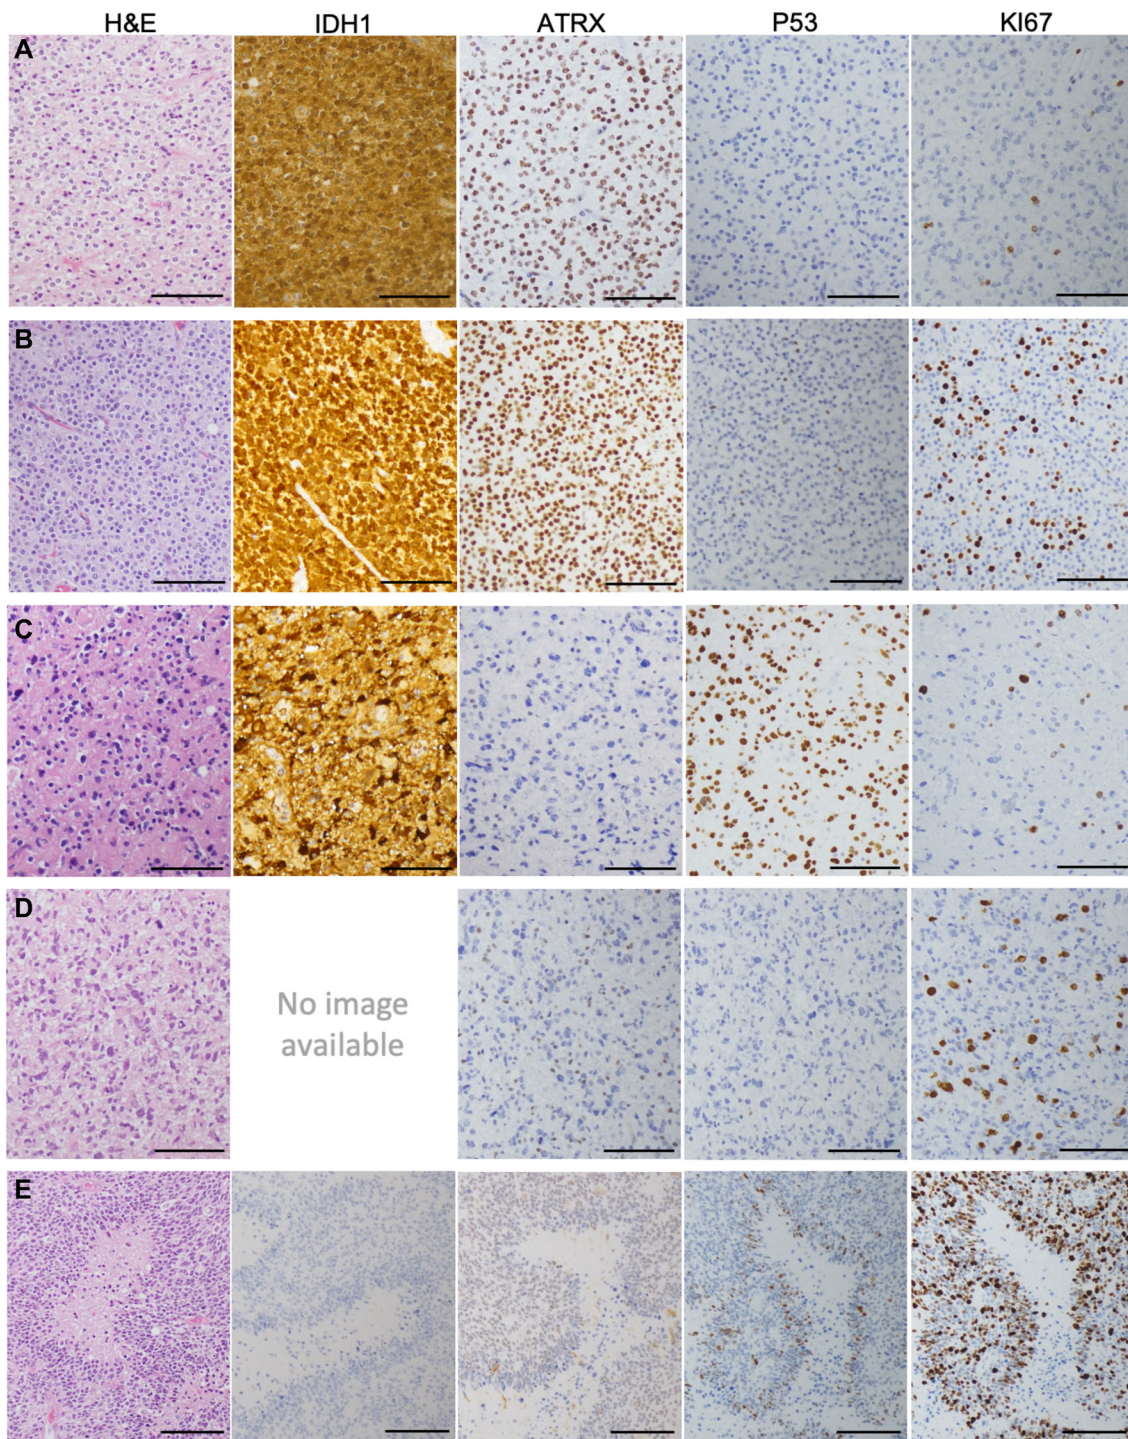

**Supplementary Figure 4: Representative images of the immunohistochemical staining obtained for diagnosing of the tumors included in the study:** Individual immunostainings are indicated on top of each figure. DAB (brown) was used for visualization of antibody binding. Nuclei were counterstained with cresyl violet (blue). **(A)** Grade 2 oligodendroglioma; IDH1 mutant, but ATRX and P53 wild type. Hematoxylin and eosin (H&E) shows the classic “fried egg” appearance. IDH1 FISH assay detected 1p/19q codeletion in all grade 2 oligodendroglioma studied. **(B)** Grade 3 oligodendroglioma: same as oligodendroglioma grade 2, but higher cellular density and proliferation (KI67). IDH1 FISH assay detected 1p/19q codeletion in all grade 3 oligodendroglioma studied. **(C)** Grade 2 astrocytoma: IDH1 mutant, loss of nuclear ATRX expression and strong nuclear immunoreactivity with antibody against P53. **(D)** Grade 3 astrocytoma: same as astrocytoma grade 2, but higher cellular density and proliferation. **(E)** Glioblastoma: lack of IDH1 positivity, loss of nuclear ATRX expression and a lot of proliferation. Typical structures of pseudopalisading necrosis are observed in all glioblastoma analyzed. Scale bars: 100  $\mu$ m.

**Supplementary Table 1: Results of the different quantifications performed**

| <b>Tumor ID</b> | <b>%BCAS1<sup>+</sup><br/>TOTAL</b> | <b>% Stellate<br/>BCAS1<sup>+</sup> cells</b> | <b>% Spherical<br/>BCAS1<sup>+</sup> cells</b> | <b>%(BCAS1<sup>+</sup>/Ki67<sup>+</sup>)/<br/>BCAS1<sup>+</sup> cells</b> | <b>%(BCAS1<sup>+</sup>/Ki67<sup>+</sup>)/<br/>KI67<sup>+</sup> cells</b> | <b>%(BCAS1<sup>+</sup>/Ki67<sup>+</sup>)/<br/>DAPI<sup>+</sup> cells</b> |
|-----------------|-------------------------------------|-----------------------------------------------|------------------------------------------------|---------------------------------------------------------------------------|--------------------------------------------------------------------------|--------------------------------------------------------------------------|
| <b>OG 1</b>     | 50.31                               | 100                                           | 0                                              | 22.84                                                                     | 65.77                                                                    | 11.49                                                                    |
| <b>OG 2</b>     | 0.27                                | 23.81                                         | 76.19                                          | 0                                                                         | 0                                                                        | 0                                                                        |
| <b>OG 3</b>     | 1.33                                | 0                                             | 100                                            | 0                                                                         | 0                                                                        | 0                                                                        |
| <b>OG 4</b>     | 0.60                                | 38.10                                         | 61.90                                          | 0                                                                         | 0                                                                        | 0                                                                        |
| <b>OG 5</b>     | 18.85                               | 100                                           | 0                                              | 1.22                                                                      | 12.24                                                                    | 0.23                                                                     |
| <b>OG 6</b>     | 0.51                                | 0                                             | 100                                            | 0                                                                         | 0                                                                        | 0                                                                        |
| <b>OG 7</b>     | 34.51                               | 100                                           | 0                                              | 0.59                                                                      | 28.57                                                                    | 0.20                                                                     |
| <b>OG 8</b>     | 0.53                                | 50                                            | 50                                             | 8.33                                                                      | 0.93                                                                     | 0.02                                                                     |
| <b>OG 9</b>     | 1.32                                | 7.32                                          | 92.68                                          | 33.33                                                                     | 0.60                                                                     | 0.03                                                                     |
| <b>OG 10</b>    | 0.69                                | 73.68                                         | 26.32                                          | 0                                                                         | 0                                                                        | 0                                                                        |
| <b>OG 11</b>    | 1.05                                | 0                                             | 100                                            | 0                                                                         | 0                                                                        | 0                                                                        |
| <b>OG 12</b>    | 15.33                               | 100                                           | 0                                              | 7.64                                                                      | 18.10                                                                    | 1.17                                                                     |
| <b>AS 1</b>     | 1.02                                | 17.86                                         | 82.14                                          | 0                                                                         | 0                                                                        | 0                                                                        |
| <b>AS 2</b>     | 3.22                                | 24.04                                         | 75.96                                          | 0                                                                         | 0                                                                        | 0                                                                        |
| <b>AS 3</b>     | 0.49                                | 0                                             | 100                                            | 0                                                                         | 0                                                                        | 0                                                                        |
| <b>AS 4</b>     | 2.48                                | 94.52                                         | 5.48                                           | 0                                                                         | 0                                                                        | 0                                                                        |
| <b>AS 5</b>     | 0.79                                | 50                                            | 50                                             | 0                                                                         | 0                                                                        | 0                                                                        |
| <b>AS 6</b>     | 1.24                                | 0                                             | 100                                            | 0                                                                         | 0                                                                        | 0                                                                        |
| <b>AS 7</b>     | 1.18                                | 37.04                                         | 62.96                                          | 0                                                                         | 0                                                                        | 0                                                                        |
| <b>AS 8</b>     | 0.54                                | 43.48                                         | 56.52                                          | 0                                                                         | 0                                                                        | 0                                                                        |
| <b>GB 1</b>     | 0.65                                | 10.71                                         | 89.29                                          | 0                                                                         | 0                                                                        | 0                                                                        |
| <b>GB 2</b>     | 1.47                                | 0                                             | 100                                            | 0                                                                         | 0                                                                        | 0                                                                        |
| <b>GB 3</b>     | 0                                   | 0                                             | 0                                              | 0                                                                         | 0                                                                        | 0                                                                        |
| <b>GB 4</b>     | 0.86                                | 0                                             | 100                                            | 0                                                                         | 0                                                                        | 0                                                                        |
| <b>GB 5</b>     | 0.57                                | 0                                             | 100                                            | 0                                                                         | 0                                                                        | 0                                                                        |
| <b>GB 6</b>     | 0.48                                | 0                                             | 100                                            | 0                                                                         | 0                                                                        | 0                                                                        |
| <b>GB 7</b>     | 0.87                                | 1.69                                          | 98.31                                          | 0                                                                         | 0                                                                        | 0                                                                        |
| <b>GB 8</b>     | 0                                   | 0                                             | 0                                              | 0                                                                         | 0                                                                        | 0                                                                        |
| <b>GB 9</b>     | 0.70                                | 3.45                                          | 96.55                                          | 0                                                                         | 0                                                                        | 0                                                                        |
| <b>GB 10</b>    | 0.18                                | 0                                             | 100                                            | 0                                                                         | 0                                                                        | 0                                                                        |

Values of all quantification performed to estimate the total percentage of BCAS1<sup>+</sup> cells in each tumor analyzed (%BCAS1<sup>+</sup> TOTAL), the percentage of stellate or spherical BCAS1<sup>+</sup> cells (%Stellate BCAS1<sup>+</sup> cells and %Spherical BCAS1<sup>+</sup> cells, respectively), and the number of proliferating stellate BCAS1-expressing cells with respect to the total BCAS1<sup>+</sup> cells ( %(BCAS1<sup>+</sup>/Ki67<sup>+</sup>)/BCAS1<sup>+</sup> cells), total proliferating cells ( %(BCAS1<sup>+</sup>/Ki67<sup>+</sup>)/KI67<sup>+</sup> cells) or total cells in the analyzed region ( %(BCAS1<sup>+</sup>/Ki67<sup>+</sup>)/DAPI<sup>+</sup> cells).

### Supplementary Table 2: Antigens studied and their characteristics

| Antigen | Antigen characteristics                                                      | References | Purpose                               |
|---------|------------------------------------------------------------------------------|------------|---------------------------------------|
| VIM     | Marker of motility and invasiveness in cancer                                | [26]       | Microenvironment and cellular traits  |
| GFAP    | Marker of astrocyte lineage                                                  | [22]       | Microenvironment and cellular traits  |
| EGFR    | Marker of cell migration, adhesion and proliferation                         | [25]       | Microenvironment and maturation state |
| OLIG2   | Marker of oligodendrocyte lineage                                            | [21]       | Maturation state                      |
| SOX10   | Transcription factor expressed in oligodendrocyte and other glial precursors | [19]       | Maturation state                      |
| CXCR4   | Marker of cell proliferation in gliomas                                      | [20]       | Cellular traits                       |
| BLBP    | Marker of cell proliferation in gliomas                                      | [18]       | Cellular traits                       |

Information on selected antigens to study in this research and the reference in the bibliography where more information on this molecule could be found.

**Supplementary Table 3: Clinical data of patients and histopathological data of tumors**

| Case ID | Sex | Age at surgery (years) | Histopathological diagnosis  | WHO Grade | Localization             | Molecular profile |      |      |      |      |      | Progression-free survival (months) | Overall survival (months) |
|---------|-----|------------------------|------------------------------|-----------|--------------------------|-------------------|------|------|------|------|------|------------------------------------|---------------------------|
|         |     |                        |                              |           |                          | 1p/19q            | IDH1 | ATRX | TP53 | MGMT | TERT |                                    |                           |
| 1       | F   | 66                     | Anaplastic Oligodendroglioma | 3         | Right parietal-occipital | Codeletion        | Mut  | NMut | NMut | Met  | Mut  | 258.85                             | 293.32                    |
| 2       | M   | 42                     | Anaplastic Oligodendroglioma | 3         | Right temporal           | Codeletion        | Mut  | NMut | NMut | Met  | Mut  | 83.93                              | 83.93                     |
| 3       | M   | 41                     | Diffuse Oligodendroglioma    | 2         | Left frontal             | Codeletion        | Mut  | NMut | NMut | Met  | Mut  | 80.38                              | 80.38                     |
| 4       | M   | 41                     | Anaplastic Oligodendroglioma | 3         | Right parietal           | Codeletion        | Mut  | ND   | NMut | Met  | Mut  | 72.13                              | 72.13                     |
| 5       | M   | 51                     | Anaplastic Oligodendroglioma | 3         | Right parietal           | Codeletion        | Mut  | NMut | NMut | Met  | Mut  | 66.24                              | 66.24                     |
| 6       | M   | 56                     | Diffuse Oligodendroglioma    | 2         | Left frontal             | Codeletion        | Mut  | NMut | NMut | Met  | Mut  | 55.35                              | 55.35                     |
| 7       | F   | 42                     | Diffuse Oligodendroglioma    | 2         | Left parietal            | Codeletion        | Mut  | NMut | NMut | Met  | Mut  | 56.60                              | 56.60                     |
| 8       | M   | 31                     | Anaplastic Oligodendroglioma | 3         | Right insula             | Codeletion        | Mut  | NMut | NMut | Met  | Mut  | 120.13                             | 178.61                    |
| 9       | F   | 33                     | Diffuse Oligodendroglioma    | 2         | Left parietal            | Codeletion        | Mut  | NMut | NMut | Met  | Mut  | 53.84                              | 53.84                     |
| 10      | F   | 45                     | Anaplastic Oligodendroglioma | 3         | Left frontal             | Codeletion        | Mut  | NMut | NMut | Met  | Mut  | 31.51                              | 35.94                     |
| 11      | F   | 59                     | Diffuse Oligodendroglioma    | 2         | Right frontal            | Codeletion        | Mut  | NMut | NMut | Met  | Mut  | 54.43                              | 54.43                     |
| 12      | M   | 60                     | Diffuse Oligodendroglioma    | 2         | Left frontal             | Codeletion        | Mut  | NMut | NMut | Met  | Mut  | 225.00                             | 233.57                    |
| 13      | F   | 28                     | Anaplastic Oligodendroglioma | 3         | Right frontal-parietal   | Codeletion        | Mut  | NMut | NMut | Met  | Mut  | 35.91                              | 35.91                     |
| 14      | F   | 57                     | Anaplastic Oligodendroglioma | 3         | Left temporal            | Codeletion        | Mut  | NMut | NMut | Met  | Mut  | 47.06                              | 47.06                     |
| 15      | F   | 40                     | Anaplastic Oligodendroglioma | 3         | Left frontal             | Codeletion        | Mut  | NMut | NMut | Met  | Mut  | 35.12                              | 35.12                     |
| 16      | M   | 49                     | Diffuse Oligodendroglioma    | 2         | Right frontal            | Codeletion        | Mut  | NMut | NMut | NMet | Mut  | 32.88                              | 32.88                     |
| 17      | F   | 45                     | Diffuse Oligodendroglioma    | 2         | Right frontal            | Codeletion        | Mut  | NMut | NMut | Met  | Mut  | 53.97                              | 53.97                     |
| 18      | M   | 53                     | Glioblastoma                 | 4         | Left temporal            | Not deleted       | NMut | NMut | Mut  | NMet | Mut  | 4.01                               | 8.03                      |

| Case ID | Sex | Age at surgery (years) | Histopathological diagnosis | WHO Grade | Localization   | Molecular profile |      |      |      |      |      | Progression-free survival (months) | Overall survival (months) |
|---------|-----|------------------------|-----------------------------|-----------|----------------|-------------------|------|------|------|------|------|------------------------------------|---------------------------|
|         |     |                        |                             |           |                | 1p/19q            | IDH1 | ATRX | TP53 | MGMT | TERT |                                    |                           |
| 19      | M   | 34                     | Glioblastoma                | 4         | Right frontal  | Not deleted       | NMut | NMut | Mut  | NMet | NMut | 3.19                               | 12.93                     |
| 20      | F   | 62                     | Glioblastoma                | 4         | Left parietal  | Not deleted       | NMut | NMut | NMut | NMet | NMut | 43.65                              | 63.75                     |
| 21      | F   | 67                     | Glioblastoma                | 4         | Right temporal | Not deleted       | NMut | NMut | NMut | NMet | Mut  | NA                                 | 16.15                     |
| 22      | M   | 59                     | Glioblastoma                | 4         | Right parietal | Not deleted       | NMut | NMut | Mut  | Met  | Mut  | 31.81                              | 53.68                     |
| 23      | F   | 75                     | Glioblastoma                | 4         | Right temporal | Not deleted       | NMut | NMut | NMut | Met  | Mut  | 4.47                               | 10.49                     |
| 24      | M   | 66                     | Glioblastoma                | 4         | Right frontal  | Not deleted       | NMut | NMut | NMut | Met  | NMut | NA                                 | ND                        |
| 25      | M   | 56                     | Glioblastoma                | 4         | Right frontal  | Not deleted       | NMut | NMut | NMut | NMet | Mut  | 0.03                               | 11.97                     |
| 26      | M   | 64                     | Glioblastoma                | 4         | Right frontal  | Not deleted       | NMut | NMut | NMut | NMet | Mut  | 8.55                               | 11.71                     |
| 27      | M   | 60                     | Glioblastoma                | 4         | Right temporal | Not deleted       | NMut | NMut | NMut | NMet | Mut  | 31.48                              | 47.01                     |
| 28      | F   | 61                     | Glioblastoma                | 4         | Left temporal  | Not deleted       | NMut | NMut | NMut | NMet | Mut  | 7.34                               | 14.38                     |
| 29      | F   | 64                     | Glioblastoma                | 4         | Right frontal  | Not deleted       | NMut | NMut | Mut  | Met  | Mut  | 0.99                               | 37.93                     |
| 30      | F   | 75                     | Glioblastoma                | 4         | Right frontal  | Not deleted       | NMut | NMut | NMut | NMet | Mut  | 4.11                               | 6.12                      |
| 31      | F   | 66                     | Glioblastoma                | 4         | Left frontal   | Not deleted       | NMut | NMut | NMut | NMet | Mut  | 36.28                              | 49.34                     |
| 32      | F   | 76                     | Glioblastoma                | 4         | Right temporal | Not deleted       | NMut | NMut | Mut  | NMet | Mut  | 0.99                               | 2.07                      |
| 33      | M   | 70                     | Glioblastoma                | 4         | Right frontal  | Not deleted       | NMut | NMut | NMut | Met  | Mut  | 14.51                              | 21.28                     |
| 34      | F   | 69                     | Glioblastoma                | 4         | Right parietal | Not deleted       | NMut | NMut | Mut  | NMet | Mut  | 3.06                               | 3.65                      |
| 35      | F   | 71                     | Glioblastoma                | 4         | Right temporal | Not deleted       | NMut | NMut | NMut | NMet | Mut  | NA                                 | 1.78                      |
| 36      | F   | 48                     | Glioblastoma                | 4         | Right frontal  | Not deleted       | NMut | NMut | NMut | NMet | Mut  | 3.29                               | 13.19                     |



| Case ID | Sex | Age at surgery (years) | Histopathological diagnosis | WHO Grade | Localization    | Molecular profile |      |      |      |      |      | Progression-free survival (months) | Overall survival (months) |
|---------|-----|------------------------|-----------------------------|-----------|-----------------|-------------------|------|------|------|------|------|------------------------------------|---------------------------|
|         |     |                        |                             |           |                 | 1p/19q            | IDH1 | ATRX | TP53 | MGMT | TERT |                                    |                           |
| 37      | M   | 71                     | Glioblastoma                | 4         | Right frontal   | Not deleted       | NMut | NMut | NMut | NMet | Mut  | 8.78                               | 8.98                      |
| 38      | M   | 74                     | Glioblastoma                | 4         | Right occipital | Not deleted       | NMut | NMut | NMut | NMet | Mut  | 2.01                               | 4.01                      |
| 39      | M   | 77                     | Glioblastoma                | 4         | Left frontal    | Not deleted       | NMut | NMut | NMut | NMet | Mut  | 15.53                              | 17.50                     |
| 40      | M   | 63                     | Glioblastoma                | 4         | Left parietal   | Not deleted       | NMut | NMut | NMut | NMet | Mut  | 9.21                               | 11.81                     |
| 41      | F   | 53                     | Glioblastoma                | 4         | Right parietal  | Not deleted       | NMut | NMut | NMut | NMet | Mut  | 7.80                               | 12.70                     |
| 42      | M   | 82                     | Glioblastoma                | 4         | Left temporal   | Not deleted       | NMut | NMut | NMut | NMet | Mut  | 5.30                               | 8.39                      |
| 43      | F   | 55                     | Glioblastoma                | 4         | Left parietal   | Not deleted       | NMut | NMut | NMut | NMet | Mut  | 6.97                               | 7.96                      |
| 44      | F   | 70                     | Glioblastoma                | 4         | Right parietal  | Not deleted       | NMut | NMut | Mut  | NMet | Mut  | 3.95                               | 13.26                     |
| 45      | F   | 71                     | Glioblastoma                | 4         | Right temporal  | Not deleted       | NMut | NMut | NMut | Met  | Mut  | 3.78                               | 8.19                      |
| 46      | M   | 68                     | Glioblastoma                | 4         | Left frontal    | Not deleted       | NMut | NMut | NMut | NMet | Mut  | 6.41                               | 7.66                      |
| 47      | F   | 68                     | Glioblastoma                | 4         | Left parietal   | Not deleted       | NMut | NMut | NMut | Met  | Mut  | 9.18                               | 9.18                      |
| 48      | F   | 68                     | Glioblastoma                | 4         | Right temporal  | Not deleted       | NMut | NMut | NMut | Met  | Mut  | 14.87                              | 17.57                     |
| 49      | M   | 71                     | Glioblastoma                | 4         | Right temporal  | Not deleted       | NMut | NMut | NMut | NMet | Mut  | 9.87                               | 11.28                     |
| 50      | M   | 56                     | Glioblastoma                | 4         | Left frontal    | Not deleted       | NMut | NMut | NMut | NMet | Mut  | 8.26                               | 12.60                     |
| 51      | M   | 45                     | Glioblastoma                | 4         | Right frontal   | Not deleted       | NMut | NMut | NMut | Met  | Mut  | 7.47                               | 19.87                     |
| 52      | F   | 75                     | Glioblastoma                | 4         | Right parietal  | Not deleted       | NMut | NMut | NMut | NMet | Mut  | 10.56                              | 12.73                     |
| 53      | F   | 76                     | Glioblastoma                | 4         | Left temporal   | Not deleted       | NMut | NMut | Mut  | NMet | Mut  | 5.86                               | 11.78                     |
| 54      | M   | 70                     | Glioblastoma                | 4         | Right parietal  | Not deleted       | NMut | NMut | Mut  | NMet | Mut  | 3.75                               | 9.11                      |

| Case ID | Sex | Age at surgery (years) | Histopathological diagnosis | WHO Grade | Localization   | Molecular profile |      |      |      |      |      | Progression-free survival (months) | Overall survival (months) |
|---------|-----|------------------------|-----------------------------|-----------|----------------|-------------------|------|------|------|------|------|------------------------------------|---------------------------|
|         |     |                        |                             |           |                | 1p/19q            | IDH1 | ATRX | TP53 | MGMT | TERT |                                    |                           |
| 55      | F   | 65                     | Glioblastoma                | 4         | Left frontal   | Not deleted       | NMut | NMut | NMut | NMet | Mut  | 30.43                              | 59.80                     |
| 56      | M   | 56                     | Glioblastoma                | 4         | Right temporal | Not deleted       | NMut | NMut | NMut | Met  | Mut  | 7.89                               | 15.99                     |
| 57      | M   | 73                     | Glioblastoma                | 4         | Right temporal | Not deleted       | NMut | NMut | NMut | NMet | Mut  | 10.26                              | 11.02                     |
| 58      | M   | 56                     | Glioblastoma                | 4         | Right frontal  | Not deleted       | NMut | NMut | NMut | Met  | Mut  | 31.81                              | 44.64                     |
| 59      | F   | 45                     | Glioblastoma                | 4         | Left parietal  | Not deleted       | NMut | NMut | Mut  | Met  | Mut  | 25.63                              | 32.43                     |
| 60      | F   | 51                     | Glioblastoma                | 4         | Left temporal  | Not deleted       | NMut | NMut | NMut | Met  | Mut  | 13.88                              | 15.00                     |
| 61      | F   | 52                     | Glioblastoma                | 4         | Right frontal  | Not deleted       | NMut | NMut | ND   | NMet | Mut  | 4.31                               | 10.69                     |
| 62      | M   | 55                     | Glioblastoma                | 4         | Left temporal  | Not deleted       | NMut | NMut | Mut  | NMet | Mut  | 5.53                               | 10.16                     |
| 63      | F   | 78                     | Glioblastoma                | 4         | Left temporal  | Not deleted       | NMut | NMut | NMut | Met  | Mut  | 2.93                               | 3.22                      |
| 64      | F   | 65                     | Glioblastoma                | 4         | Left temporal  | Not deleted       | NMut | NMut | NMut | Met  | Mut  | NA                                 | NA                        |
| 65      | F   | 65                     | Glioblastoma                | 4         | Right parietal | Not deleted       | NMut | NMut | ND   | Met  | Mut  | 19.05                              | 24.31                     |
| 66      | M   | 61                     | Glioblastoma                | 4         | Left frontal   | Not deleted       | NMut | NMut | NMut | Met  | Mut  | 12.04                              | 18.26                     |
| 67      | F   | 38                     | Glioblastoma                | 4         | Left occipital | Not deleted       | NMut | NMut | Mut  | NMet | Mut  | 19.08                              | 33.62                     |
| 68      | M   | 41                     | Glioblastoma                | 4         | Right temporal | Not deleted       | NMut | NMut | ND   | NMet | Mut  | 4.70                               | 6.88                      |
| 69      | F   | 52                     | Glioblastoma                | 4         | Right temporal | Not deleted       | NMut | NMut | Mut  | NMet | Mut  | 16.41                              | 18.95                     |
| 70      | F   | 71                     | Glioblastoma                | 4         | Right frontal  | Not deleted       | NMut | NMut | NMut | Met  | Mut  | 8.88                               | 13.55                     |
| 71      | M   | 71                     | Glioblastoma                | 4         | Left temporal  | Not deleted       | NMut | NMut | ND   | NMet | Mut  | 9.51                               | 18.75                     |
| 72      | F   | 74                     | Glioblastoma                | 4         | Right frontal  | Not deleted       | NMut | NMut | NMut | Met  | Mut  | 23.98                              | 24.77                     |

| Case ID | Sex | Age at surgery (years) | Histopathological diagnosis                  | WHO Grade | Localization    | Molecular profile |      |      |      |      |      | Progression-free survival (months) | Overall survival (months) |
|---------|-----|------------------------|----------------------------------------------|-----------|-----------------|-------------------|------|------|------|------|------|------------------------------------|---------------------------|
|         |     |                        |                                              |           |                 | 1p/19q            | IDH1 | ATRX | TP53 | MGMT | TERT |                                    |                           |
| 73      | F   | 75                     | Glioblastoma                                 | 4         | Right frontal   | Not deleted       | NMut | NMut | ND   | Met  | Mut  | 4.14                               | 6.25                      |
| 74      | M   | 73                     | Glioblastoma                                 | 4         | Right temporal  | Not deleted       | NMut | NMut | Mut  | NMet | Mut  | 8.91                               | 13.49                     |
| 75      | F   | 64                     | Glioblastoma                                 | 4         | Right occipital | Not deleted       | NMut | NMut | ND   | NMet | Mut  | 0.86                               | 3.32                      |
| 76      | M   | 84                     | Glioblastoma                                 | 4         | Right temporal  | Not deleted       | NMut | NMut | NMut | Met  | Mut  | 3.03                               | 3.03                      |
| 77      | F   | 73                     | Glioblastoma                                 | 4         | Right temporal  | Not deleted       | NMut | NMut | Mut  | NMet | NMut | 4.47                               | 6.76                      |
| 78      | F   | 45                     | Diffuse Astrocytoma                          | 2         | Left frontal    | Not deleted       | ND   | ND   | Mut  | Met  | NMut | 84.99                              | 84.99                     |
| 79      | F   | 51                     | Diffuse Astrocytoma                          | 2         | Left frontal    | Not deleted       | Mut  | ND   | Mut  | Met  | NMut | 88.01                              | 88.01                     |
| 80      | M   | 53                     | Anaplastic Astrocytoma                       | 3         | Right insula    | ND                | ND   | Mut  | NMut | Met  | NMut | 12.66                              | 66.01                     |
| 81      | M   | 25                     | Anaplastic Astrocytoma                       | 3         | Right frontal   | ND                | Mut  | Mut  | Mut  | Met  | NMut | NA                                 | NA                        |
| 82      | M   | 40                     | Anaplastic Astrocytoma                       | 3         | Left frontal    | Not deleed        | Mut  | Mut  | Mut  | Met  | NMut | 77.68                              | 77.68                     |
| 83      | M   | 32                     | Diffuse Astrocytoma                          | 2         | Left temporal   | ND                | Mut  | Mut  | Mut  | Met  | NMut | 23.32                              | 75.41                     |
| 84      | M   | 33                     | Diffuse Astrocytoma                          | 2         | Left frontal    | ND                | Mut  | Mut  | Mut  | Met  | NMut | 44.16                              | 44.16                     |
| 85      | M   | 36                     | Diffuse Astrocytoma                          | 2         | Left frontal    | ND                | Mut  | Mut  | Mut  | Met  | NMut | 61.58                              | 60.55                     |
| 86      | F   | 5                      | Non-tumor control (focal cortical dysplasia) | NA        | Right frontal   | NA                | NA   | NA   | NA   | NA   | NA   | NA                                 | NA                        |
| 87      | F   | 2                      | Non-tumor control (focal cortical dysplasia) | NA        | Right frontal   | NA                | NA   | NA   | NA   | NA   | NA   | NA                                 | NA                        |
| 88      | F   | 8                      | Non-tumor control (focal cortical dysplasia) | NA        | Right temporal  | NA                | NA   | NA   | NA   | NA   | NA   | NA                                 | NA                        |

Abbreviations: F: Female; M: Male; NA: Not applicable; ND: No data; Mut: Mutated; NMut: No mutated; Met: Methylated; NMet: No methylated.
